# Supplementary material for: An Fe-doped Co-oxide electrocatalyst synthesized through a post-modification method toward advanced water oxidation
Source: Royal Society of Chemistry journal article supplement (doi:10.1039/d1dt03936a), 2022-01-01
Supplement: d1dt03936a1.pdf [file d1dt03936a1.pdf]

## Electronic Supplementary Information

# A Fe-doped Co-oxide Electrocatalyst Synthesized Through Post-Modification Method Toward Advanced Water Oxidation

Zhenhang Xu<sup>a</sup>, Wei Zuo<sup>a</sup>, Tianyu Shi<sup>a</sup>, Xinghai Liu<sup>b</sup>, Houbin Li<sup>b</sup>, Pingping Zhao,<sup>\*b</sup>  
and Gongzhen Cheng<sup>\*a</sup>

### Chemical reaction processes of catalysts

In a facile experiment, 0.8 mmol  $\text{Co}(\text{SO}_4)_2 \cdot 7\text{H}_2\text{O}$ , 0.8 mmol urea and 0.8 mmol  $\text{NH}_4\text{F}$  were dispersed in 40 mL of ultrapure water in an ultrasonication bath to form homogeneous solution. Subsequently the above solution was transferred to a Teflon-lined stainless-steel autoclave (50 mL). The whole system was sealed and then heated to 120 °C for 6 h. After being taken out and left to cool to room temperature, the product (i.e.  $\text{Co}(\text{OH})\text{F}$  precursor) was washed several times with ultrapure water and ethanol, and dried at 80 °C overnight. Then, in a secondary hydrothermal process, 50 mg of  $\text{Co}(\text{OH})\text{F}$  precursor synthesized before were put into a 50 mL Teflon-lined stainless-steel autoclave containing a uniform solution of a certain amount of  $\text{FeCl}_3 \cdot 6\text{H}_2\text{O}$  and 40 mL of  $\text{N,N}$ -Dimethylformamide. Immediately after, the autoclaves were maintained at 100°C for 4 h. After the reaction is complete, the products (i.e.  $\text{CoFe}(\text{OH})\text{F}-\alpha$ ) were washed several times with ethanol by centrifugation and dried at 80 °C. Finally, the prepared  $\text{CoFe}(\text{OH})\text{F}-\alpha$  were put in quartz tube and then filled the entire system with nitrogen. After a further calcination at 300 °C for 30 min,  $\text{Co}_{3-x}\text{Fe}_x\text{O}_4-\alpha$  were obtained. As a control,  $\text{Co}(\text{OH})\text{F}$  that had not been treated with  $\text{FeCl}_3 \cdot 6\text{H}_2\text{O}$  was also calcined under the same conditions, which was marked as  $\text{Co}_3\text{O}_4$  according to the XRD pattern.

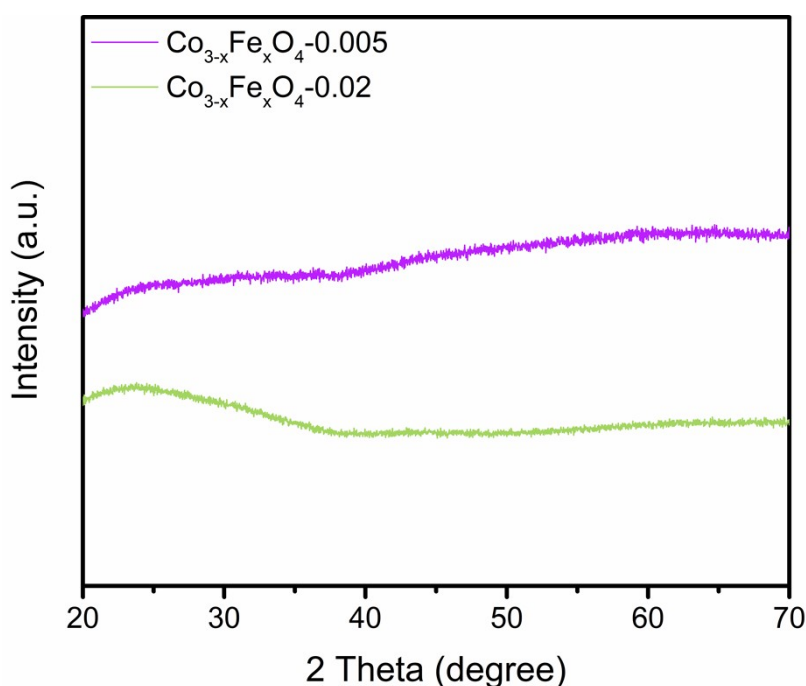

Figure S1. XRD patterns of  $\text{Co}_{3-x}\text{Fe}_x\text{O}_4-0.005$  and  $\text{Co}_{3-x}\text{Fe}_x\text{O}_4-0.02$ .

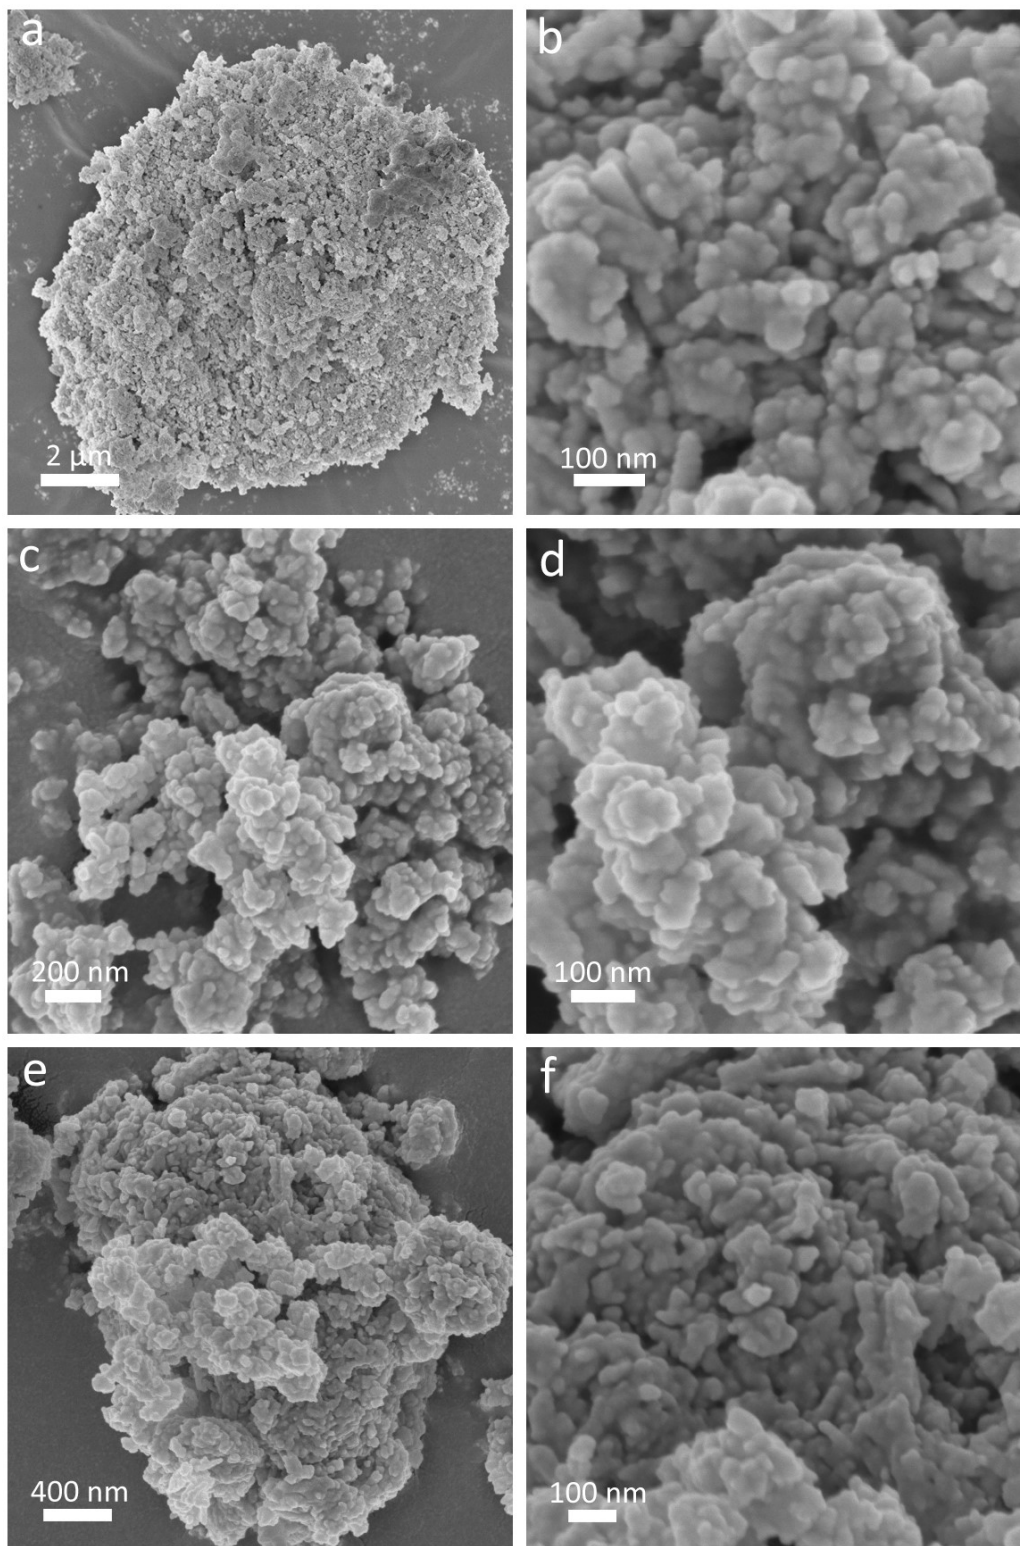

**Figure S2. FESEM images of (a) and (b) CoFe(OH)F-0.005, (c) and (d) CoFe(OH)F-0.01, (e) and (f) CoFe(OH)F-0.02.**

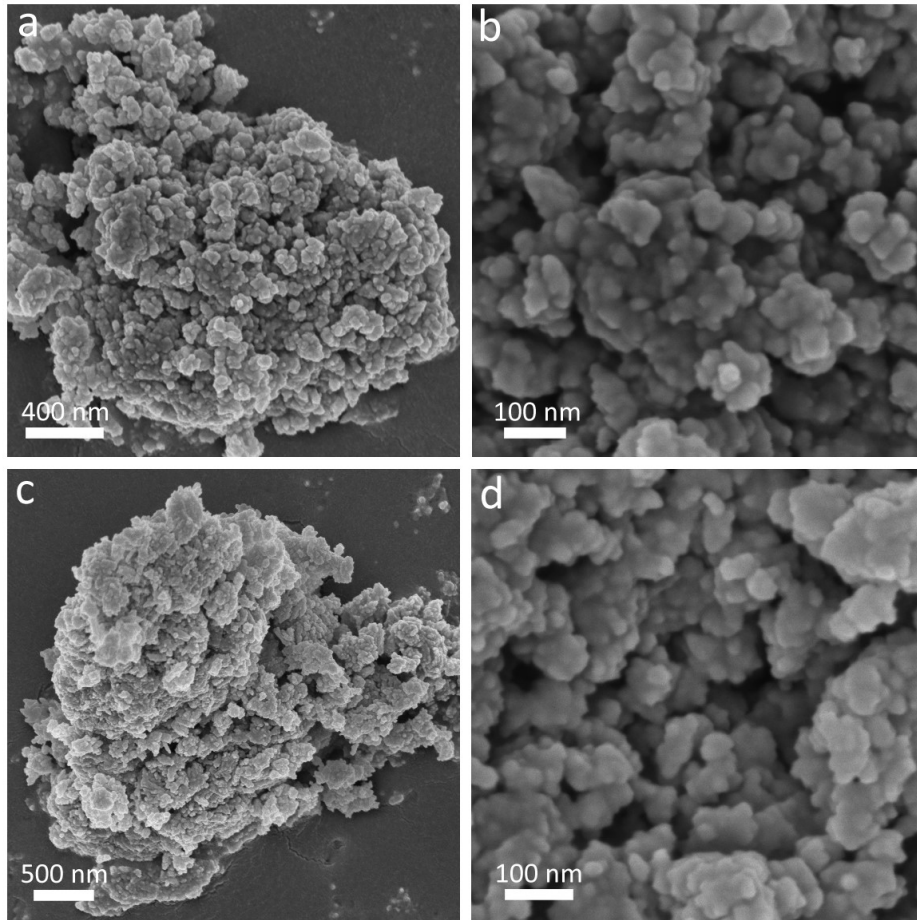

**Figure S3.** FESEM images of (a) and (b)  $\text{Co}_{3-x}\text{Fe}_x\text{O}_4-0.005$ , (c) and (d)  $\text{Co}_{3-x}\text{Fe}_x\text{O}_4-0.02$ .

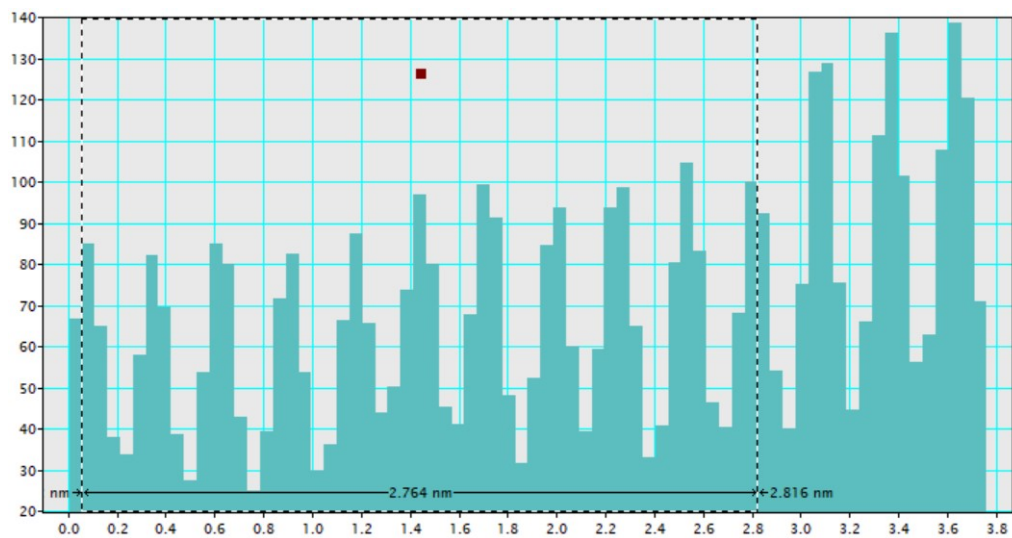

**Figure S4.** The corresponding crystal lattice analysis of  $\text{Co}_{3-x}\text{Fe}_x\text{O}_4-0.01$ .

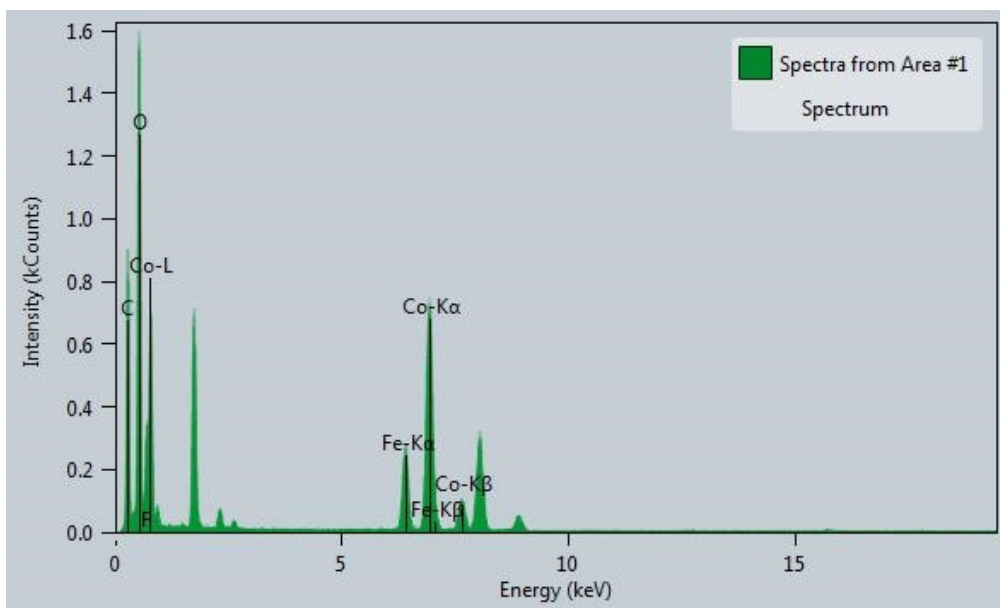

**Figure S5. EDX spectrum of  $\text{Co}_{3-x}\text{Fe}_x\text{O}_4\text{-0.01}$ .**

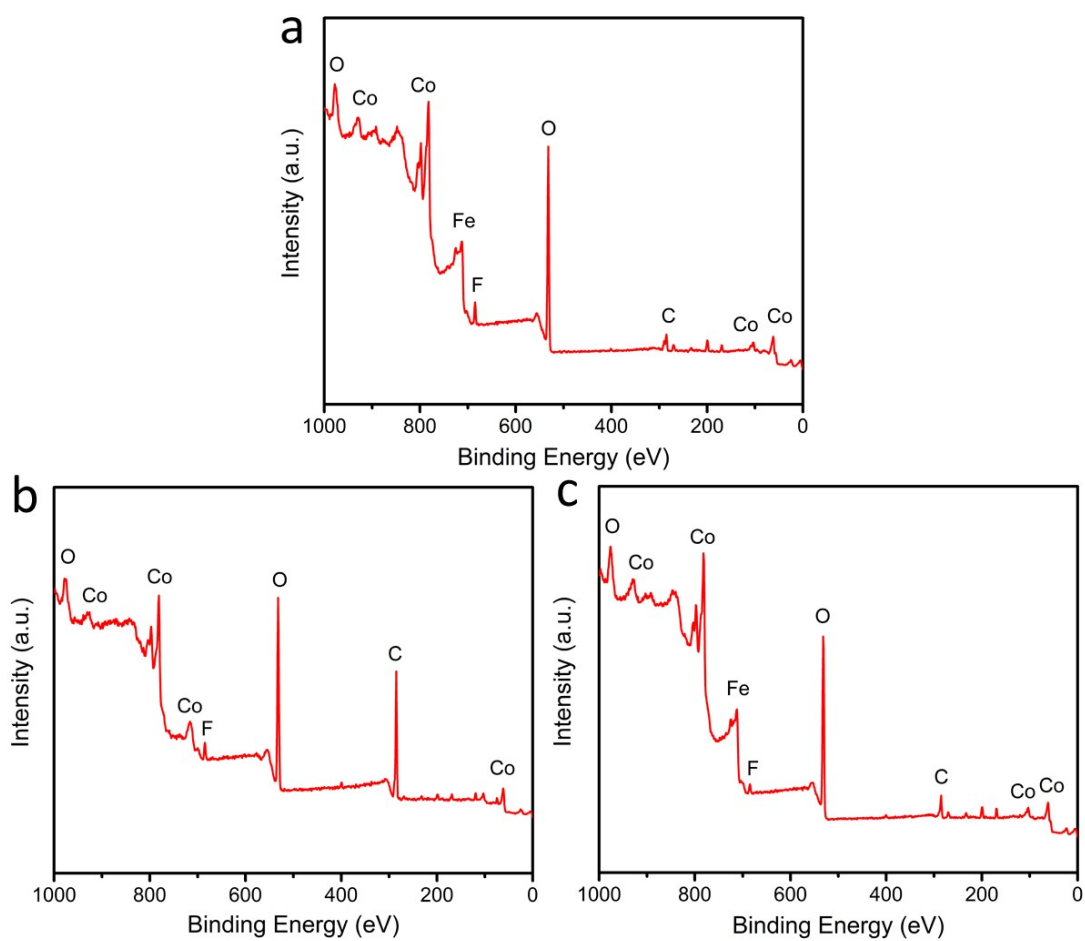

**Figure S6. XPS survey spectrum of (a)  $\text{CoFe(OH)F-0.01}$ , (b)  $\text{Co}_3\text{O}_4$  and (c)  $\text{Co}_{3-x}\text{Fe}_x\text{O}_4\text{-0.01}$ .**

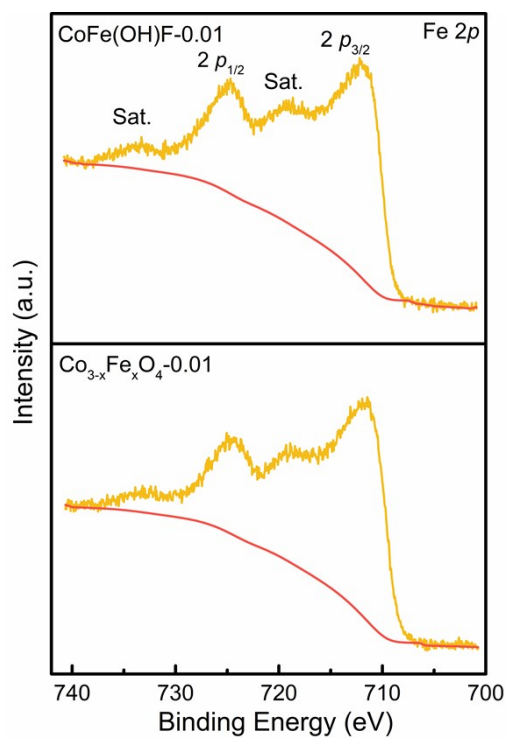

**Figure S7. XPS high-resolution spectra of Fe 2p of (a) CoFe(OH)F-0.01 and (b)  $\text{Co}_{3-x}\text{Fe}_x\text{O}_4-0.01$ .**

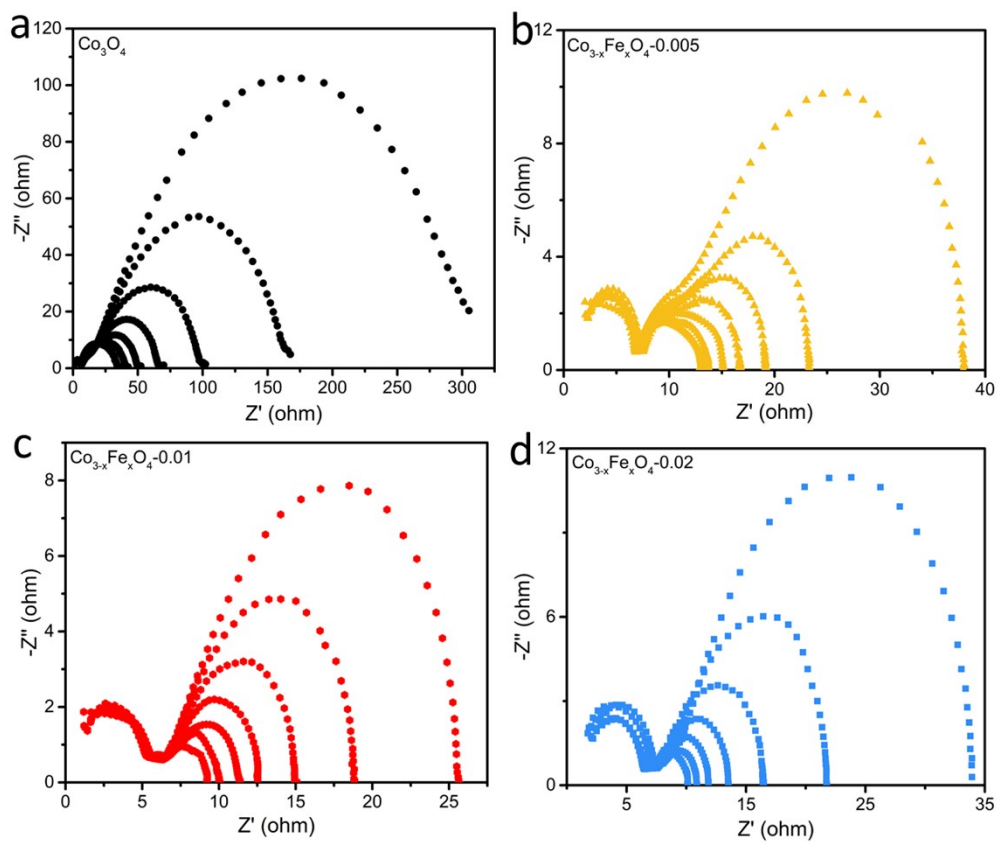

**Figure S8. EIS plots at the potential from 1.52 to 1.67 V vs. RHE of (a)  $\text{Co}_3\text{O}_4$ , (b)  $\text{Co}_{3-x}\text{Fe}_x\text{O}_4-0.005$ , (c)  $\text{Co}_{3-x}\text{Fe}_x\text{O}_4-0.01$  and (d)  $\text{Co}_{3-x}\text{Fe}_x\text{O}_4-0.02$ .**

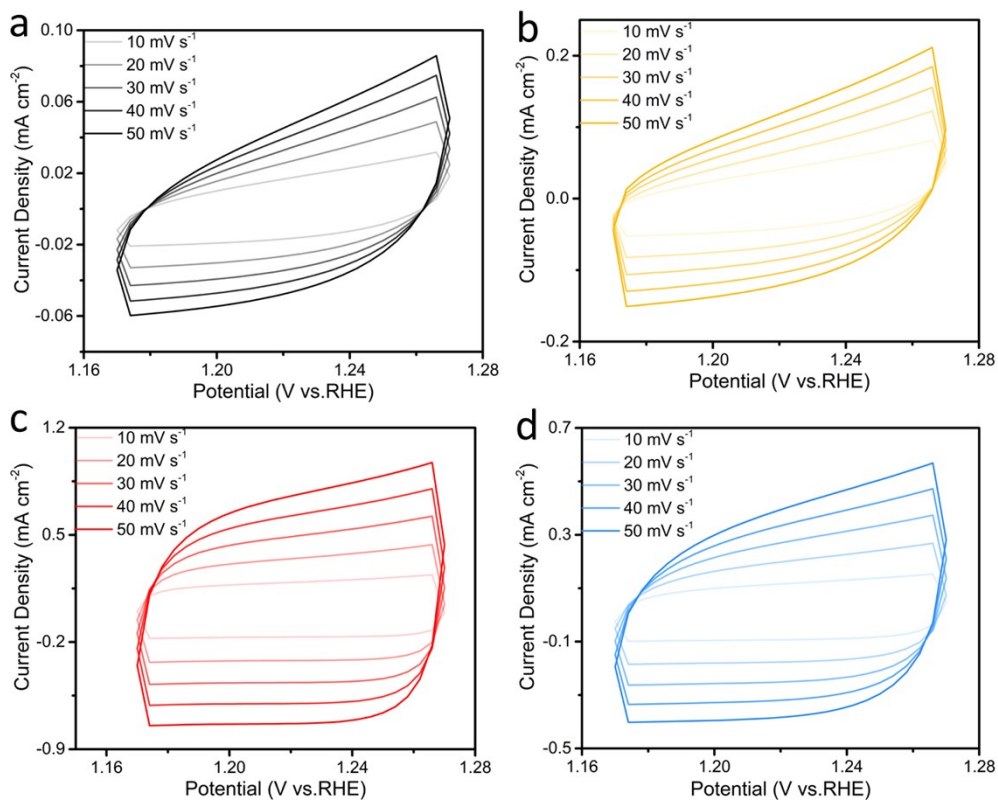

**Figure S9. CV curves of (a) Co<sub>3</sub>O<sub>4</sub>, (b) Co<sub>3-x</sub>Fe<sub>x</sub>O<sub>4</sub>-0.005, (c) Co<sub>3-x</sub>Fe<sub>x</sub>O<sub>4</sub>-0.01 and (d) Co<sub>3-x</sub>Fe<sub>x</sub>O<sub>4</sub>-0.02 under potential of 1.17-1.27 V vs RHE with different scan rate from 10 to 50 mV s<sup>-1</sup>.**

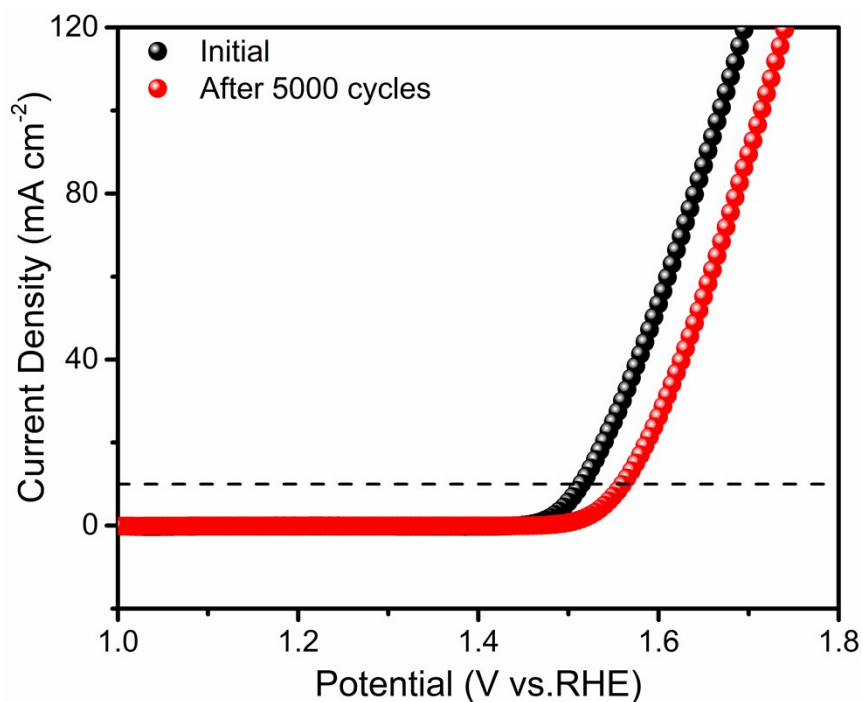

**Figure S10. LSV curve of CoFe(OH)F-0.01 before and after 5000 cycles of CV.**

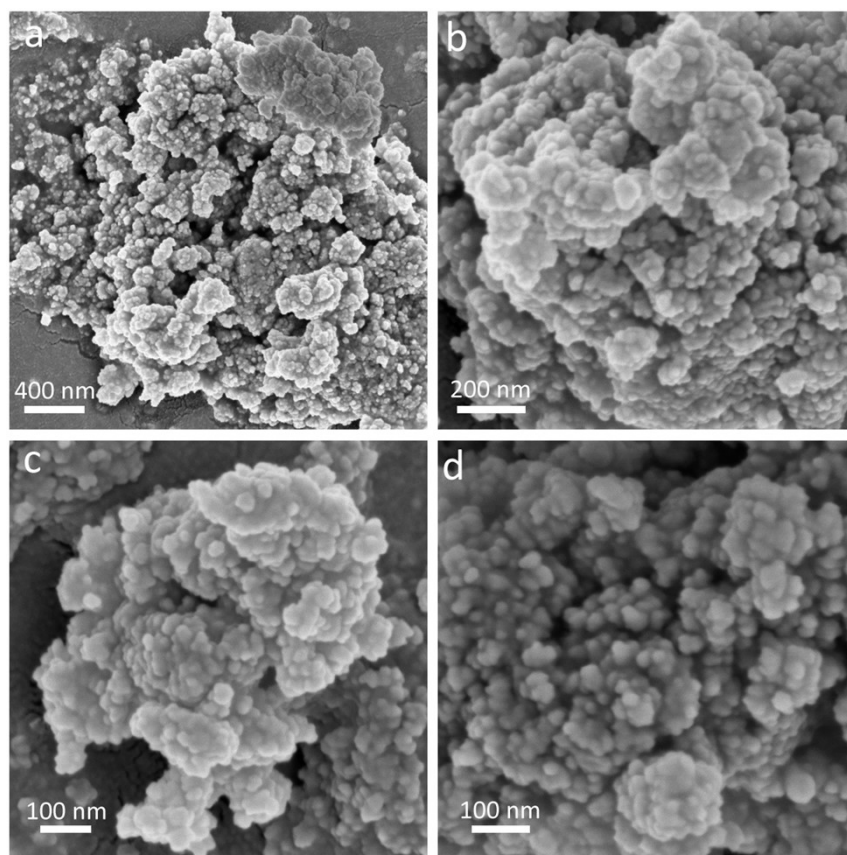

**Figure S11. FESEM images of  $\text{Co}_{3-x}\text{Fe}_x\text{O}_4\text{-0.01}$  after OER tests.**

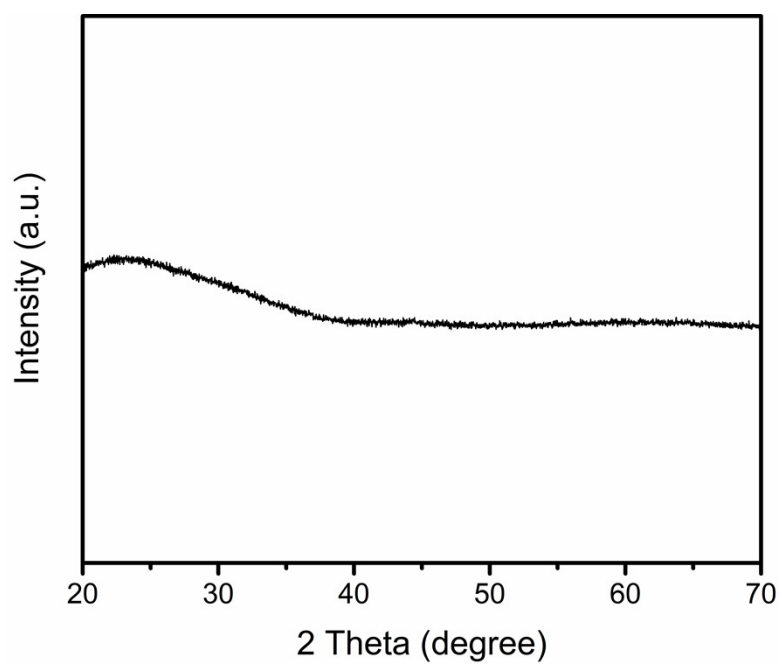

**Figure S12. XRD pattern of  $\text{Co}_{3-x}\text{Fe}_x\text{O}_4\text{-0.01}$  after OER tests.**



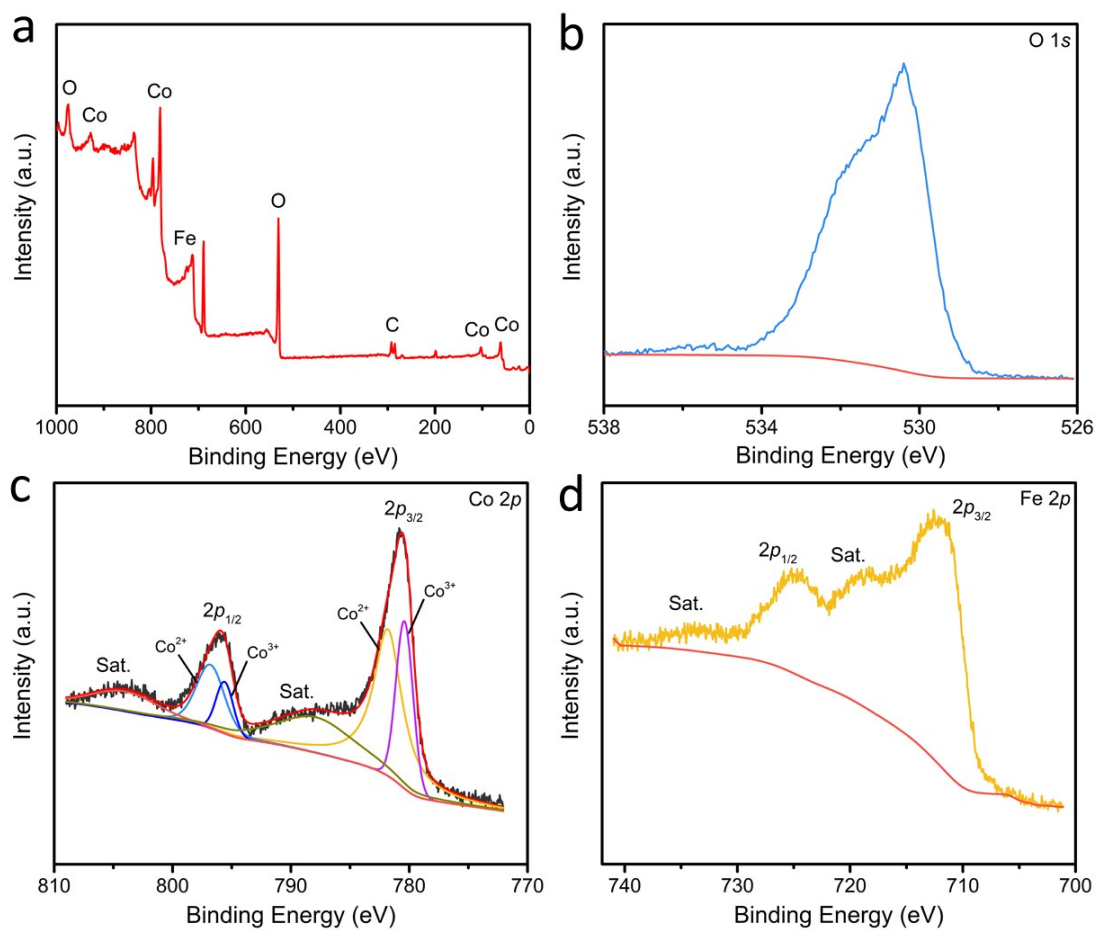

**Figure S13. (a) XPS survey spectrum, XPS high-resolution spectra of (b) O 1s, (c) Co 2p and (d) Fe 2p of  $\text{Co}_{3-x}\text{Fe}_x\text{O}_{4-0.01}$  after OER tests.**

**Table S1. Percentage of elements corresponding to EDX spectrum of Co<sub>3-x</sub>Fe<sub>x</sub>O<sub>4</sub>-0.01.**

| Z  | Element | Family | Atomic Fraction (%) | Atomic Error (%) | Mass Fraction (%) | Mass Error (%) | Fit error (%) |
|----|---------|--------|---------------------|------------------|-------------------|----------------|---------------|
| 6  | C       | K      | 39.08               | 5.57             | 20.39             | 1.69           | 2.67          |
| 8  | O       | K      | 40.56               | 9.93             | 28.19             | 6.08           | 1.77          |
| 26 | Fe      | K      | 5.24                | 1.01             | 12.70             | 1.96           | 0.17          |
| 27 | Co      | K      | 15.12               | 2.92             | 38.72             | 5.99           | 0.16          |

**Table S2. The quantitative information of the samples of Co-O, CoFe-OH-0.01 and Co<sub>3-x</sub>Fe<sub>x</sub>O<sub>4</sub>-0.01 based on the XPS results in Figure 5b.**

| Sample                                                 | Co <sup>2+</sup> 2p <sub>3/2</sub> (eV) | Co <sup>2+</sup> (%) | Co <sup>3+</sup> 2p <sub>3/2</sub> (eV) | Co <sup>3+</sup> (%) |
|--------------------------------------------------------|-----------------------------------------|----------------------|-----------------------------------------|----------------------|
| CoFe(OH)F-0.01                                         | 781.8                                   | 77.7                 | 780.5                                   | 22.3                 |
| Co <sub>3</sub> O <sub>4</sub>                         | 781.8                                   | 67.5                 | 780.4                                   | 32.5                 |
| Co <sub>3-x</sub> Fe <sub>x</sub> O <sub>4</sub> -0.01 | 781.9                                   | 66.3                 | 780.5                                   | 33.7                 |

**Table S3. Comparison of OER performance between Co<sub>3-x</sub>Fe<sub>x</sub>O<sub>4</sub>-0.01 and CoFe bimetal base electrocatalysts reported in recent years.**

| Catalyst                                               | Overpotential at 10 mA cm <sup>-2</sup> (mV) | Tafel Slope (mV dec <sup>-1</sup> ) | Electrolyte | Reference |
|--------------------------------------------------------|----------------------------------------------|-------------------------------------|-------------|-----------|
| Co <sub>3-x</sub> Fe <sub>x</sub> O <sub>4</sub> -0.01 | 294                                          | 47.3                                | 1.0 M KOH   | This work |
| CoFe-LDH/MWCNT/rGO                                     | 430                                          | 77.73                               | 1.0 M KOH   | 1         |
| CoFe-200                                               | 316                                          | 49.6                                | 1.0 M KOH   | 2         |
| CoFe-LDH/MXene                                         | 352                                          | 50                                  | 1.0 M KOH   | 3         |
| 25%La-CoFe LDH                                         | 317                                          | 125                                 | 1.0 M KOH   | 4         |
| CoFe-CoFe <sub>2</sub> O <sub>4</sub> /N-CNTs          | 334                                          | 80                                  | 1.0 M KOH   | 5         |
| CoFe@N-C-700°C                                         | 292                                          | 64                                  | 1.0 M KOH   | 6         |
| CoFe LDH/Co <sub>3</sub> O <sub>4</sub> (6:4)          | 290                                          | 77                                  | 1.0 M KOH   | 7         |
| CoFe(OH) <sub>x</sub> -2                               | 293                                          | 67.4                                | 1.0 M KOH   | 8         |
| CoFe/LDH – pulsed 0.1                                  | 286                                          | 48                                  | 1.0 M KOH   | 9         |
| CoFe-H                                                 | 280                                          | 28                                  | 1.0 M KOH   | 10        |
| CoFe@NC-700                                            | 380                                          | 110                                 | 0.1 M KOH   | 11        |
| CoFe/Co <sub>8</sub> Fe <sub>8</sub> /CNT              | 290                                          | 38                                  | 1.0 M KOH   | 12        |
| CoFe@HNSs                                              | 371                                          | 69.5                                | 0.1 M KOH   | 13        |
| NPMC/CoFe                                              | 310                                          | 50.6                                | 1.0 M KOH   | 14        |
| CoFe-PYZ                                               | 300                                          | 44                                  | 0.1 M KOH   | 15        |
| CoFe@N-CNWF                                            | 320                                          | 71.4                                | 1.0 M KOH   | 16        |
| CoFe LDH-F                                             | 300                                          | 40                                  | 1.0 M KOH   | 17        |
| CoFe@N-C/MNGF                                          | 330                                          | 130.6                               | 0.1 M KOH   | 18        |
| CoFe-Co@PNC-12                                         | 320                                          | 82                                  | 0.1 M KOH   | 19        |
| CoFeP NSs                                              | 305                                          | 49.6                                | 1.0 M KOH   | 20        |

## Reference

1. Y. J. Yang, M. Duan, C. Yan, D. Zhao, C. Jiang, X. Duan and X. Song, Facile synthesis of CoFe-LDH/MWCNT/rGO nanocomposite as efficient bifunctional electrocatalysts for oxygen evolution and reduction, *J. Electroanal. Chem.*, 2020, **856**.
2. S. Jo, S. Noh, K. R. Wee and J. H. Shim, Structural Features of Porous CoFe Nanocubes and Their Performance for Oxygen - involving Energy Electrocatalysis, *ChemElectroChem*, 2020, **7**, 3725-3732.
3. C. Hao, Y. Wu, Y. An, B. Cui, J. Lin, X. Li, D. Wang, M. Jiang, Z. Cheng and S. Hu, Interface-coupling of CoFe-LDH on MXene as high-performance oxygen evolution catalyst, *Materials Today Energy*, 2019, **12**, 453-462.
4. M. Rong, H. Zhong, S. Wang, X. Ma and Z. Cao, La/Ce doped CoFe layered double hydroxides (LDH) highly enhanced oxygen evolution performance of water splitting, *Colloids and Surfaces A: Physicochemical and Engineering Aspects*, 2021, **625**.
5. D. Xu, B. Liu, G. Liu, K. Su, C. Yang, H. Tong, D. Qian and J. Li, N-doped bamboo-like CNTs combined with CoFe-CoFe<sub>2</sub>O<sub>4</sub> as a highly efficient electrocatalyst towards oxygen evolution, *Int. J. Hydrogen Energy*, 2020, **45**, 6629-6635.
6. X. Zeng, M. J. Jang, S. M. Choi, H.-S. Cho, C.-H. Kim, N. V. Myung and Y. Yin, Single-crystalline CoFe nanoparticles encapsulated in N-doped carbon nanotubes as a bifunctional catalyst for water splitting, *Mater. Chem. Front.*, 2020, **4**, 2307-2313.
7. P. Ma, H. Yang, Y. Luo, Y. Liu, Y. Zhu, S. Luo, Y. Hu, Z. Zhao and J. Ma, Strongly Coupled Interface Structure in CoFe/Co<sub>3</sub>O<sub>4</sub> Nanohybrids as Efficient Oxygen Evolution Reaction Catalysts, *ChemSusChem*, 2019, **12**, 4442-4451.
8. X. Yue, W. Ke, M. Xie, X. Shen, Z. Yan, Z. Ji, G. Zhu, K. Xu and H. Zhou, Amorphous CoFe(OH)<sub>x</sub> hollow hierarchical structure: an efficient and durable electrocatalyst for oxygen evolution reaction, *Catalysis Science & Technology*, 2020, **10**, 215-221.
9. A. M. P. Sakita, R. D. Noce, E. Vallés and A. V. Benedetti, Pulse electrodeposition of CoFe thin films covered with layered double hydroxides as a fast route to prepare enhanced catalysts for oxygen evolution reaction, *Appl. Surf. Sci.*, 2018, **434**, 1153-1160.
10. W. Liu, H. Liu, L. Dang, H. Zhang, X. Wu, B. Yang, Z. Li, X. Zhang, L. Lei and S. Jin, Amorphous Cobalt-Iron Hydroxide Nanosheet Electrocatalyst for Efficient Electrochemical and Photo-Electrochemical Oxygen Evolution, *Adv. Funct. Mater.*, 2017, **27**.
11. K. Meng, Z. Zheng, J. Cao, L. Liu, Z. Jia, Y. Wang and T. Qi, Vanadium nitride based CoFe prussian blue analogues for enhanced electrocatalytic oxygen evolution, *Int. J. Hydrogen Energy*, 2020, **45**, 31410-31417.
12. B. Wang, Y. Hu, B. Yu, X. Zhang, D. Yang and Y. Chen, Heterogeneous CoFe-Co<sub>8</sub>FeS<sub>8</sub> nanoparticles embedded in CNT networks as highly efficient and stable electrocatalysts for oxygen evolution reaction, *J. Power Sources*, 2019, **433**.
13. X. Zhang, Z. Zhu, Y. Tan, K. Qin, F. X. Ma and J. Zhang, Co, Fe codoped holey carbon nanosheets as bifunctional oxygen electrocatalysts for rechargeable Zn-air batteries, *Chem Commun (Camb)*, 2021, **57**, 2049-2052.
14. Y. Ma, L. Gan, D. Li, Y. Gao, X. Yang, K. Wang, S. Lu, H. Wu, S. Ding and C.

- Xiao, Rational modulation of N, P co-doped carbon nanotubes encapsulating Co<sub>3</sub>Fe<sub>7</sub> alloy as bifunctional oxygen electrocatalysts for Zinc–Air batteries, *J. Power Sources*, 2019, **441**.
15. J. Gao, J. Cong, Y. Wu, L. Sun, J. Yao and B. Chen, Bimetallic Hofmann-Type Metal–Organic Framework Nanoparticles for Efficient Electrocatalysis of Oxygen Evolution Reaction, *ACS Appl. Energy Mater.*, 2018, DOI: 10.1021/acsaem.8b01229.
  16. Q. Zhou, L. Ai, Q. Li, S. Hou, L. Xu, D. Sun, H. Pang, K. Huang and Y. Tang, A “Ship-in-a-Bottle” strategy to anchor CoFe nanoparticles inside carbon nanowall-assembled frameworks for high-efficiency bifunctional oxygen electrocatalysis, *Chem. Eng. J.*, 2021, **417**.
  17. P. F. Liu, S. Yang, B. Zhang and H. G. Yang, Defect-Rich Ultrathin Cobalt-Iron Layered Double Hydroxide for Electrochemical Overall Water Splitting, *ACS Appl Mater Interfaces*, 2016, **8**, 34474-34481.
  18. D. I. Jeong, H. W. Choi, S. Woo, J. H. Yoo, M. Kumar, Y. H. Song, B. Lim, B. K. Koo, B. K. Kang and D. H. Yoon, Complementary performance improved crystalline N-doped carbon encapsulated CoFe/mesoporous N-doped graphene foam as bifunctional catalyst, *Appl. Surf. Sci.*, 2021, **559**.
  19. Z. Lei, Y. Tan, Z. Zhang, W. Wu, N. Cheng, R. Chen, S. Mu and X. Sun, Defects enriched hollow porous Co-N-doped carbons embedded with ultrafine CoFe/Co nanoparticles as bifunctional oxygen electrocatalyst for rechargeable flexible solid zinc-air batteries, *Nano Research*, 2020, **14**, 868-878.
  20. H. Xu, J. Wei, C. Liu, Y. Zhang, L. Tian, C. Wang and Y. Du, Phosphorus-doped cobalt-iron oxyhydroxide with ultrafine nanosheet structure enable efficient oxygen evolution electrocatalysis, *J. Colloid Interface Sci.*, 2018, **530**, 146-153.
